# Supplementary material for: Synthesis of dimethylformamide from CO2, H2 and dimethylamine over Cu/ZnO
Source: Royal Society of Chemistry journal article supplement (doi:10.1039/c0cc00751j), 2010-01-01
Supplement: c0cc00751j.pdf [file c0cc00751j.pdf]

# Synthesis of Dimethylformamide from CO<sub>2</sub>, H<sub>2</sub> and dimethylamine over Cu/ZnO

Jinli Liu, Chengkun Guo, Zhaofu Zhang, Tao Jiang, Huizhen Liu, Jinliang Song,  
Honglei Fan, Buxing Han\*

National Laboratory for Molecular Sciences, Institute of Chemistry, Chinese Academy of Sciences,  
Beijing 100190, PR China

\*Fax: 86-10-62559373; Tel: 86-10-62562821; E-mail: [hanbx@iccas.ac.cn](mailto:hanbx@iccas.ac.cn)

## 1. Experimental Section

**Chemicals** Cu(NO<sub>3</sub>)<sub>2</sub>·3H<sub>2</sub>O and Zn(NO<sub>3</sub>)<sub>2</sub>·6H<sub>2</sub>O were purchased from Sinopharm Chemical Reagent Co. Ltd. Al(NO<sub>3</sub>)<sub>3</sub>·9H<sub>2</sub>O, Na<sub>2</sub>CO<sub>3</sub>, Ce(NO<sub>3</sub>)<sub>3</sub>·6H<sub>2</sub>O, Na<sub>2</sub>B<sub>4</sub>O<sub>7</sub>, HCl (36% aqueous solution), H<sub>2</sub>SO<sub>4</sub>, ammonia aqueous solution (28%), DMF, n-butanol, and ethanol were provided by Beijing Chemical Reagent Company. Dimethylammonium-dimethylcarbamate (DIMCARB) was purchased from ACROS Organics. The molar ratio of dimethylamine to CO<sub>2</sub> in the DIMCARB was 1.6:1, as determined by standard acid base titration method.<sup>S1</sup> All chemicals above were analytical grade and used as received. The CO<sub>2</sub> (>99.99%), H<sub>2</sub> (>99.99%), and N<sub>2</sub> (>99.95%) were provided by Beijing Analytical Instrument Company.

**Determination of dimethylamine content in dimethylammonium-dimethylcarbamate (DIMCARB)** The content of dimethylamine in the DIMCARB was determined according to the standard acid base titration method.<sup>S1</sup> In the experiment, the mixture of 0.1g DIMCARB and 3mL concentrated H<sub>2</sub>SO<sub>4</sub> was heated in a three-necked flask at 413 K for 2 hours. 15mL of 40% (w/v) NaOH solution was added and distillation was performed and the distillate entered a 25mL of 4% (w/v) boric acid solution. Water was injected regularly into the three-necked flask during the distillation. The distillation continued until about 100 mL of the distillate was obtained. An mixed solution of indicators (0.2% (w/v) methyl red ethanol solution and 0.1%(w/v) methylene blue ethanol solution) was added into the distillate before titrating with a standardized 0.1mol/L HCl solution for dimethylamine content. The molar ratio of dimethylamine to CO<sub>2</sub> in the DIMCARB was 1.6:1. The repeatability of the method was better than ±3%.

**Catalyst characterization** The scanning electron microscopy (SEM) examination was conducted on a Hitachi-s4800 electron microscope operated at 10 kV. The samples were spray-coated with a thin layer of platinum before observation. The transmission electron microscopy (TEM) characterization was carried out on JEM 2011 at an accelerating voltage of 100 kV. The samples were dispersed in ethanol and dropped on a carbon film supported on copper grid for TEM analysis. Powder XRD measurements were performed on a Rigaku D/max2500 diffractometer using CuKα radiation (λ=1.5406 Å). X-ray photoelectron spectroscopy (XPS) data were obtained with an ESCALab220i-XL electron spectrometer from VG Scientific using 300W AlKα radiation. The base pressure was about 3×10<sup>-9</sup> mbar. The binding energies were referenced to the C1s line at 284.8 eV from adventitious

carbon. The ratios of the metals in the catalysts were calculated from the masses of the chemicals used to prepare the catalysts, which agreed well with the data determined in this work by ICP (ICP-OES, Optima 5300DV). This is understandable because the precursors of Cu, Zn, and Al are insoluble at the pH value to prepare the catalysts.<sup>S2</sup>

## 2. Results

**SEM, TEM, and HRTEM images of the catalysts** The SEM, TEM, and HRTEM images of the Cu/ZnO/Al<sub>2</sub>O<sub>3</sub>, Cu/Al<sub>2</sub>O<sub>3</sub>, ZnO/Al<sub>2</sub>O<sub>3</sub>, Cu, ZnO, Al<sub>2</sub>O<sub>3</sub> catalysts used are presented in Figures S1-S6.

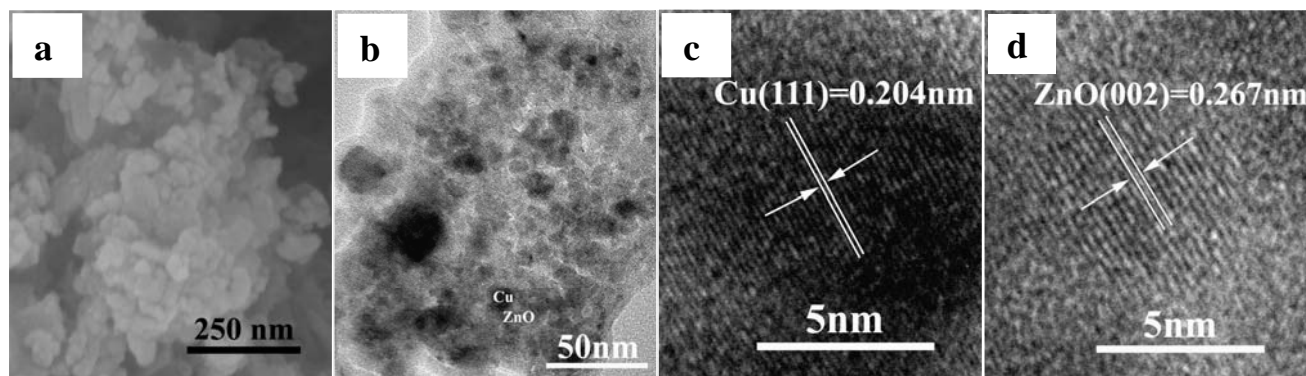

Figure S1. The SEM, TEM, HRTEM images of Cu/ZnO/Al<sub>2</sub>O<sub>3</sub> (3:2:2)

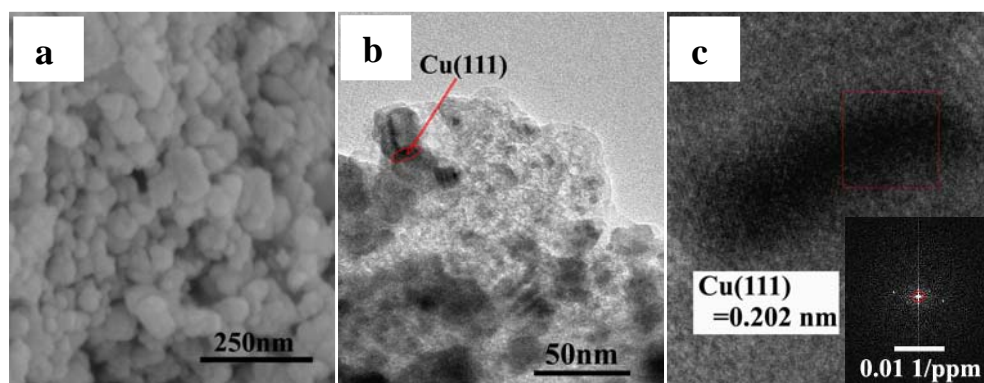

Figure S2. The SEM, TEM, HRTEM images of Cu/Al<sub>2</sub>O<sub>3</sub> (3:2)

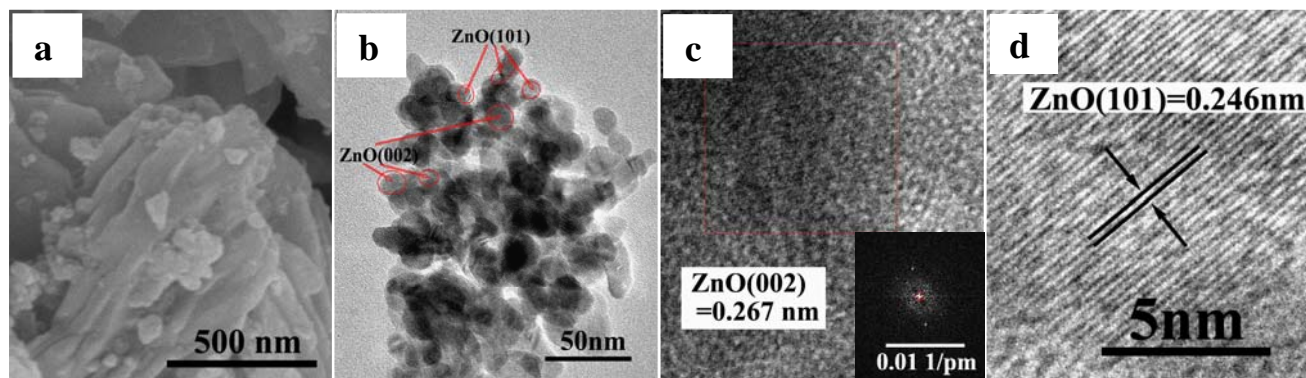

Figure S3. The SEM, TEM, HRTEM images of ZnO/Al<sub>2</sub>O<sub>3</sub> (1:1)

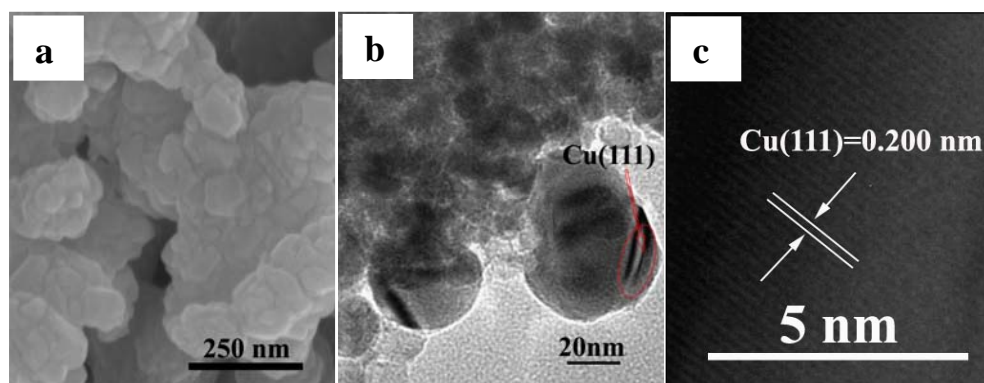

Figure S4. The SEM, TEM, HRTEM images of Cu

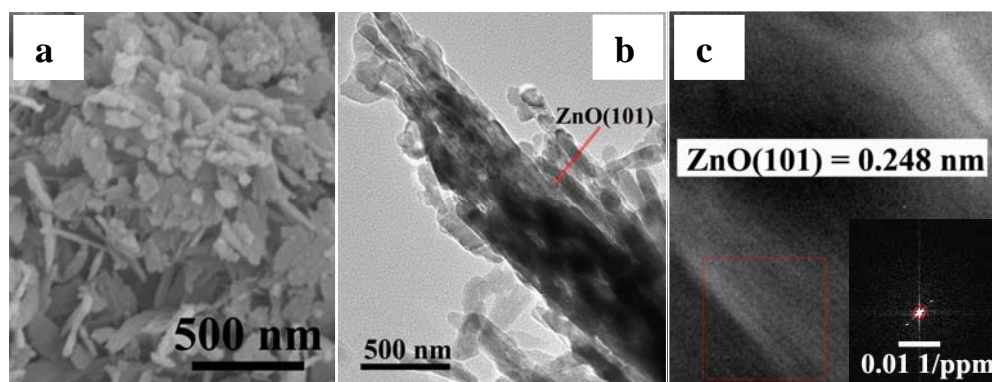

Figure S5. The SEM, TEM, HRTEM images of ZnO

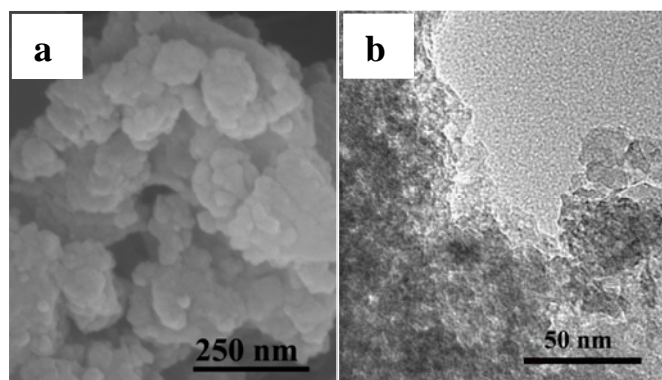

Figure S6 The SEM, TEM, HRTEM images of  $\text{Al}_2\text{O}_3$

## References

- (S1) (a) HG/T 2971- 1999, Ultimate analysis of coal. (b) GB/T 476-2001, Solutions of methylamines for industrial use-Standard test method.
- (S2) K. Nishida, I. Atake, D. Li, T. Shishido, Y. Oumi, T. Sano and K. Takehira. *Appl. Catal. A: General* 2008, **337**, 48–57.
